# Supplementary material for: HLA-E–restricted immune responses are crucial for the control of EBV infections and the prevention of PTLD
Source: PubMed Central journal article supplement — Blood. 2022 Dec 9;141(13):1560–73. doi: 10.1182/blood.2022017650 (PMC10651774; doi:10.1182/blood.2022017650), 2022-12-09
Supplement: BLOOD_BLD-2022-017650-mmc1.pdf [file BLOOD_BLD-2022-017650-mmc1.pdf]

## 1 **Supplementary Information**

### 2 **Supplementary Methods**

#### 3 Study cohort

4 In our study, a total of 1404 patients were included. Of these, 578 patients had confirmed  
5 infectious mononucleosis (IM), 412 adult or adolescent patients and 166 children. IM was  
6 clinically confirmed in all patients by the triad of fever, lymphadenopathy and tonsillitis and  
7 serologically by EBV-VCA-specific IgM, but non-detectable EBV-EBNA-specific IgG antibodies.

8 In all IM patients, EBV-DNA was detected by EBV-PCR.

9 We further included 28 elderly patients with symptomatic EBV-reactivation. All elderly  
10 patients were >60 years old and were tested for EBV, due to a fever of unknown origin. All  
11 elderly patients had EBV-DNA detectable by PCR, as well as detectable EBV-VCA-specific IgM,  
12 as well as EBV-EBNA- and EBV-VCA-specific IgG antibodies.

13 Furthermore, 180 immunocompromised transplant recipients were included in the study. All  
14 had undergone either solid-organ- (SOT, N=149) or hematopoietic stem cell transplantation  
15 (HSCT, N=31) between 1999 and 2018, and were followed up for three years after  
16 transplantation.

17 HSCT recipients underwent matched unrelated donor (N=11), matched related donor (N=10)  
18 or autologous (N=10) HSCT. SOT recipients underwent kidney (N=86), liver (N=29), lung  
19 (N=20), heart (N=11), or heart-lung transplantation (N=1). All transplant patients were tested  
20 positive for EBV-DNA by EBV-PCR either due to unspecific symptoms, *i.e.* fever of unknown  
21 origin (N=144), or in case of PTLD diagnosis (N=36). EBV<sup>+</sup> PTLD occurred between 35-302 days  
22 post-infection in 16 HSCT and 20 SOT patients, and was diagnosed using histological and/or  
23 cytological findings according to published international guidelines<sup>12-14</sup>.

24 In all non-PTLD patients an EBV-replication, exceeding >1000 copies/mL plasma, was detected  
25 by EBV-PCR. These patients had, however, no clinical evidence of PTLD (HSCT Non-PTLD,  
26 N=129 and SOT Non-PTLD, N=20).

27 We further included 206 healthy EBV-EBNA- and EBV-VCA-specific IgG positive individuals,  
28 who had never self-reported symptoms related to an IM in the past. At the time of sampling,  
29 none of the patients had positive EBV-PCR or VCA-specific IgM antibodies. Patients of the  
30 asymptomatic EBV-infection cohort were recruited using a questionnaire, sent to former  
31 patients of the Center for Virology, Medical University of Vienna. Details of the study cohort  
32 are shown in Table 1.

33 We then also included 412 control subjects (controls) in our study, who were selected  
34 independent of the EBV-status. Controls and asymptomatic EBV-infected individuals were  
35 matched to the adolescent/adult IM cohort in regard of the age and gender using case-control  
36 matching (SPSS 25).

37 From each patient, one plasma sample was available: From adolescent/adult IM and pediatric  
38 IM patients, the elderly and Non-PTLD patients during the EBV-viremic phase; from PTLD  
39 patients during the EBV-viremic phase, immediately (0-3 days) after the first diagnosis of PTLD.  
40 From asymptomatic EBV-infected individuals and controls, plasma samples were available,  
41 which was sent to the Center for Virology, Medical University of Vienna for routine vaccination  
42 titre controls. All plasma samples were part of the Biobank of the Center for Virology. From  
43 N=10 of all pediatric IM patients (6%) and N=10 of all adolescent/adult IM patients (2.4%),  
44 additional peripheral blood mononuclear cells (PBMC) were available after 10-23 and 1-8  
45 years, respectively, after diagnosis of IM. From additional N=20 of all asymptomatic EBV-  
46 infected patients (9.7%), PBMC were also available.

47 For the functional assays, we also included 30 healthy, voluntary blood donors (EBNA EBV-IgG  
48 seropositive, N=24; EBNA EBV-IgG seronegative, N=6). From the healthy, voluntary blood  
49 donors, no information about the age, gender, or occurrence of an IM in the past were  
50 available.

51

#### 52 HLA-E, LMP-1 and BZLF1 genotyping

53 Genomic and viral DNA was isolated from 200µL plasma using the NucliSens EasyMag  
54 extractor (bioMérieux). Nucleic acids were eluted in 50 µl nuclease-free H<sub>2</sub>O. HLA-E  
55 genotyping was performed using a recently published TaqMan assay and HLA-E\*0101- and  
56 HLA-E\*0103-specific probes <sup>1,2</sup>. *LMP-1* variants were determined by nested PCR, followed by  
57 Sanger-Sequencing, as described before <sup>3</sup>. *BZLF1* peptide encoding sequences were analyzed  
58 by complete *BZLF1* gene amplification by nested PCR and subsequent Sanger-sequencing as  
59 previously described in detail <sup>4</sup>. DNA sequences were translated into protein sequences using  
60 the ExPasy tool, developed by the Swiss-Prot group and supported by the SIB Swiss Institute  
61 of Bioinformatics (<https://web.expasy.org/translate/>).

62

#### 63 EBV-detection and serology

64 Viral DNA was isolated from plasma samples using NucliSens EasyMag extractor. Nucleic acids  
65 were eluted in 50 µl nuclease-free H<sub>2</sub>O. EBV-DNA was detected and quantified by TaqMan  
66 assay using recently published protocols <sup>5</sup>. EBV VCA IgM, EBNA IgG and VCA IgG antibodies  
67 were detected and quantified by ELISA (all: Euroimmune).

68

69

## 70 Isolation of primary cells

71 Peripheral blood mononuclear cells (PBMCs) from 30 voluntary and healthy blood donors,  
72 from additional 20 former IM patients and from additional 20 asymptomatic EBV-infected  
73 individuals were isolated from buffy-coats by Ficoll-Paque PLUS density (Cytiva) gradient  
74 centrifugation according to the manufacture's instruction. CD56<sup>+</sup> NK cells and CD8<sup>+</sup> T cells  
75 were then enriched by magnetic labelling using the human CD56<sup>+</sup> NK cell or the CD8<sup>+</sup> T Cell  
76 Isolation Kit according to the manufacturer's instruction (both: Miltenyi Biotec). Cells were  
77 stored frozen at -80 °C in 4x10<sup>6</sup> viable cell per aliquots in 90% FCS + 10% DMSO (Thermo-  
78 Fisher). One CD56<sup>+</sup> NK cells or CD8<sup>+</sup> T cells aliquot of each blood donor was stained for CD56  
79 and CD3 or CD8, CD4 and CD3, respectively, to ensure the purity of both cell subsets. Only  
80 samples with >95% CD56<sup>+</sup>CD3<sup>-</sup> NK cells or CD8<sup>+</sup>CD4<sup>-</sup>CD3<sup>+</sup> T cells were included in the study.

81

## 82 HLA-E stabilization experiments

83 HLA-E surface stabilization was induced as previously described <sup>6</sup>. In brief, TAP-incompetent  
84 K562-HLA-E\*0101/0101 and K562-HLA-E\*0103/0103 (kindly provided by Thorbald van Hall,  
85 Leiden University Medical Center) were cultured in Iscove's Modified Dulbecco's Medium  
86 (IMDM) + 10% FCS (both: Thermo-Scientific). 5x10<sup>5</sup> cells/ml were incubated together with  
87 300µM of *VMAPRTLIL* (positive control), *BZLF1*-derived *SQAPLPCVL* or *LMP-1* peptides  
88 (Peptides&Elephants) in 1 ml Opti-MEM (Thermo-Fisher) for 16 h at 37°C. Peptide-pulsed cells  
89 were either stained for HLA-E surface expression by flow-cytometry analysis or washed with  
90 complete medium and used for *in vitro* stimulations.

91 Identification of *SQAPLPCVL*-specific, HLA-E-restricted CD8<sup>+</sup> T cells

92 CD8<sup>+</sup> MACS-enriched cells were quickly thawed at 37°C, washed once, and rested overnight in  
93 RPMI, 10% FCS, 1% L-glutamine at 37°C. CD8<sup>+</sup> T cells were then harvested by centrifugation  
94 (400xg, 5 min) and then washed once with Opti-MEM I Reduced Serum Medium. CD8<sup>+</sup> T cells  
95 were then cultured together with peptide pulsed K562–HLA-E\*0101/0101, K562–HLA-  
96 E\*0103/0103 or K562 cells (Effector : Target, E:T, 1:2), 1x monensin and 1x brefeldin A (both:  
97 Biolegend) for 6h. CD8<sup>+</sup> T cells were then harvested, fixed with the FIX & PERM Cell Fixation &  
98 Cell Permeabilization Kit (Thermo-Scientific) and analysed by flow-cytometry, as described  
99 below. *SQAPLPCVL*-specific, HLA-E-restricted CD8<sup>+</sup> T cells of each donor were identified as  
100 IFN $\gamma$  positive cells and in comparison to cells, stimulated with K562–HLA-E\*0101/0101 or  
101 K562–HLA-E\*0103/0103 or K562 cells, but without peptides, respectively.

102

103 Creation of CR2-expressing cell lines

104 TAP-competent K562–HLA-E\*0101/0101 and K562–HLA-E\*0103/0103 (kindly provided by  
105 Thorbald van Hall, Leiden University Medical Center) were cultured in IMDM + 10% FCS. The  
106 cells were transfected with the CR2/CD21-receptor using the CD21 CRISPR activation plasmid  
107 (h) according to the manufacture's instruction (Santa Cruz Biotechnology). Successful  
108 CR2/CD21 insertion was confirmed by CD21 surface expression by flow-cytometry. K562-CR2-  
109 HLA-E\*0101/0101 and K562-CR2-HLA-E\*0103/0103 were afterwards sorted for the high  
110 expression of CD21, as described below.

111

112 Virus dissemination assays

113 For the virus dissemination assays, the marmoset B-lymphoblastoid cell line B95-8 was  
114 cultured in RPMI 1640 medium supplemented with 20 mM glutamine, 50pg/ml gentamicin,  
115 0.2 pg/ml amphotericin B and 10% FCS (Thermo-Scientific). Cells were then cultured in the  
116 presence of 12-O-tetradecanoyl-phorbol-12-acetate (Biomol) for two weeks. EBV was  
117 harvested from the supernatant and enriched by ultracentrifugation (30000 U/min, 90 min,  
118 10°C). The virus stocks, expressing the *BZLF1 SQAPLPCVL* and the *LMP-1 GGDPHLPTL* variant,  
119 were stored at -80°C in RPMI 1640 medium + 10% FCS + 10% DMSO (all: Thermo-Scientific).  
120 The multiplicity of infection (MOI) of the viral stocks was determined on K562-CR2-HLA-  
121 E\*0101/0101 and K562-CR2-HLA-E\*0103/0103 cells by flow-cytometry.

122 RMA-S/HLA-E/LFA-3 cells (kindly provided by Chiara Romagnani, DRFZ, Berlin) were  
123 maintained in RPMI-1640 + 20 mM glutamine + 10% FCS + 20µM β-mercaptoethanol + 100  
124 U/ml penicillin-streptomycin (all Thermo Fisher) + 400µg/ml hygromycin B + 1mg/ml G418  
125 (both InvivoGen). 2x10<sup>6</sup> RMA-S/LFA3/HLA-E cells were incubated for 16h at 37°C, 5% CO<sub>2</sub>, with  
126 300µM of respective peptides (Peptides&Elephants) in 1ml serum-free OptiMEM (Thermo-  
127 Fisher). Cells were afterwards inactivated using 20 µg/mL Mitomycin C (Sigma Aldrich) at 37° C  
128 for 30 minutes. Peptide pulsed RMA-S/LFA3/HLA-E cells were co-cultured with 2mM CFSE  
129 (Thermo-Fisher) stained CD56<sup>+</sup> or CD8<sup>+</sup> MACS-enriched cells for 7 days in RPMI+10% FCS.  
130 Proliferating (CFSE<sup>low</sup>) NKG2A<sup>+</sup>CD56<sup>+</sup> NK cells, NKG2A<sup>+</sup>CD8<sup>+</sup> T cells or *SQAPLPCVL*-specific, HLA-  
131 E-restricted NKG2A<sup>+</sup> or NKG2A<sup>-</sup> CD8<sup>+</sup> T cells were then sorted by FACS as described below.  
132 Proliferating *SQAPLPCVL*-specific, HLA-E-restricted CD8<sup>+</sup> T cells of each donor were identified  
133 as CFSE<sup>low</sup> in comparison to cells, stimulated with RMA-S/HLA-E/LFA-3, but without peptides.

134 Fresh K562-CR2-HLA-E\*0101/0101 and K562-CR2-HLA-E\*0103/0103 cells were then  
135 inactivated using 20 µg/mL Mitomycin C at 37° C for 30 minutes and then infected with the  
136 EBV B95-8 isolate (MOI=1) for 24h. The infected cells were then co-cultured together with the  
137 sorted NKG2A<sup>+</sup> CD56<sup>+</sup> NK cells, NKG2A<sup>+</sup> CD8<sup>+</sup> T cells or *SQAPLPCVL*-specific, HLA-E-restricted  
138 NKG2A<sup>+</sup> or NKG2A<sup>-</sup> T cells (E:T, 1:2). In some experiments, 300µM of respective peptides was  
139 also added. At indicated time points, the cells were harvested and analyzed by flow-cytometry,  
140 as described below.

141

#### 142 CD8<sup>+</sup> proliferation Assay

143 For the CD8<sup>+</sup> T cell proliferation assays, *SQAPLPCVL* pulsed TAP-deficient K562-HLA-  
144 E\*0101/0101 or K562-HLA-E\*0103/0103 cells were first inactivated using 20 µg/mL  
145 Mitomycin C (Sigma Aldrich) at 37° C for 30 minutes. The cells were then co-cultivated with  
146 CFSE stained MACS-enriched CD8<sup>+</sup> T cells for 7 days (E:T, 2:1). After three days, fresh peptide-  
147 pulsed K562-HLA-E\*0101/0101 or K562-HLA-E\*0103/0103 cells were added to the culture.  
148 Cells were then analysed after 7 days by flow-cytometry, as described below.

149

#### 150 NKG2A<sup>+</sup> NK cells and NKG2A<sup>+</sup> CD8<sup>+</sup> T cell inhibition assay

151 For the NKG2A<sup>+</sup> NK cell inhibition experiments, MACS-enriched CD56<sup>+</sup> cells were quickly  
152 thawed at 37°C, washed, and pre-activated overnight in RPMI, 10% FCS, 1% L-glutamine (all:  
153 Thermo Fisher Scientific), 10 ng/ml IL-12 (PeproTec) and 100 ng/ml IL-18 (Biozym Scientific) at  
154 37°C. CD56<sup>+</sup> NK cells were then harvested by centrifugation at 400xg for 5 minutes and washed  
155 once with Opti-MEM I Reduced Serum Medium (Gibco). The NK cells were then cultured  
156 together with peptide pulsed K562-HLA-E\*0101/0101 or K562-HLA-E\*0103/0103 cells (E:T,

157 1:2) and 5µL mouse anti-human CD107-APC-H7 (BD) for 6h. NK cells were then harvested,  
158 fixed with the FIX & PERM Cell Fixation & Cell Permeabilization Kit (Thermo-Scientific) and  
159 analysed by flow-cytometry, as described below.

160 For the CD8<sup>+</sup> T cells experiments, CD8<sup>+</sup> MACS-enriched cells were quickly thawed at 37°C,  
161 washed once, and pre-activated overnight in RPMI, 10% FCS, 1% L-glutamine and 20 ng/ml IL-  
162 2 (PeproTec) at 37°C. CD8<sup>+</sup> T cells were then harvested by centrifugation (400xg, 5 min) and  
163 then washed once with Opti-MEM I Reduced Serum Medium. CD8<sup>+</sup> T cells were then cultured  
164 together with peptide pulsed K562–HLA-E\*0101/0101 or K562–HLA-E\*0103/0103 cells (E:T,  
165 1:2), 1x monensin and 1x brefeldin A for 6h. CD8<sup>+</sup> T cells were harvested, fixed with the FIX &  
166 PERM Cell Fixation & Cell Permeabilization Kit and analysed by flow-cytometry, as described  
167 below.

168

#### 169 Flow-cytometry

170 The following conjugated mouse anti-human mAB were used for flow-cytometry: BV421-CD56  
171 (NCAM 16.2), BV421-CD8 (RPA-T8), BV510-CD4 (M-T477), BV510-NKG2A (131411), APC/H7-  
172 CD107a (H4A3), APC/CD21 (all: BD), APC-CD3 (UCHT1), APC/Cy7-IFN $\gamma$  (B27), APC-HLA/E (all:  
173 Biolegend), APC-Cy7-Granzyme B (Abcore), BZLF1-Alexa488 (Novusbio). Dead cells were  
174 identified using LIVE/DEAD Fixable Green Dead Cell Stain Kit (Thermo-Scientific) or 7-  
175 Aminoactinomycin D (7-AAD, Invitrogen). Flow-cytometry analysis was performed on a  
176 FACSCanto2 platform and FACSDiva Version 10.7.2 (BD). For cell sorting, dead cells were first  
177 removed using the Dead Cell Removal Kit (Miltenyi Biotec) and sorted with a FACSria Fusion  
178 (BD).

179



180 Statistical analysis

181 The Chi-square test and Fisher's exact test were used to compare the distribution of the  
182 HLA-E and *LMP-1* variants. Outliers of the flow cytometry data were first identified using the  
183 ROUT method and then compared between the groups with the RM one-way ANOVA (with  
184 the Geisser-Greenhouse correction), the Kruskal-Wallis Test and the Dunn's post-test,  
185 Wilcoxon signed-rank test or the Mann-Whitney test. A p-value < 0.05 was considered  
186 statistically significant. Statistical differences were assessed with GraphPad Prism 9.

187

# Figure S1

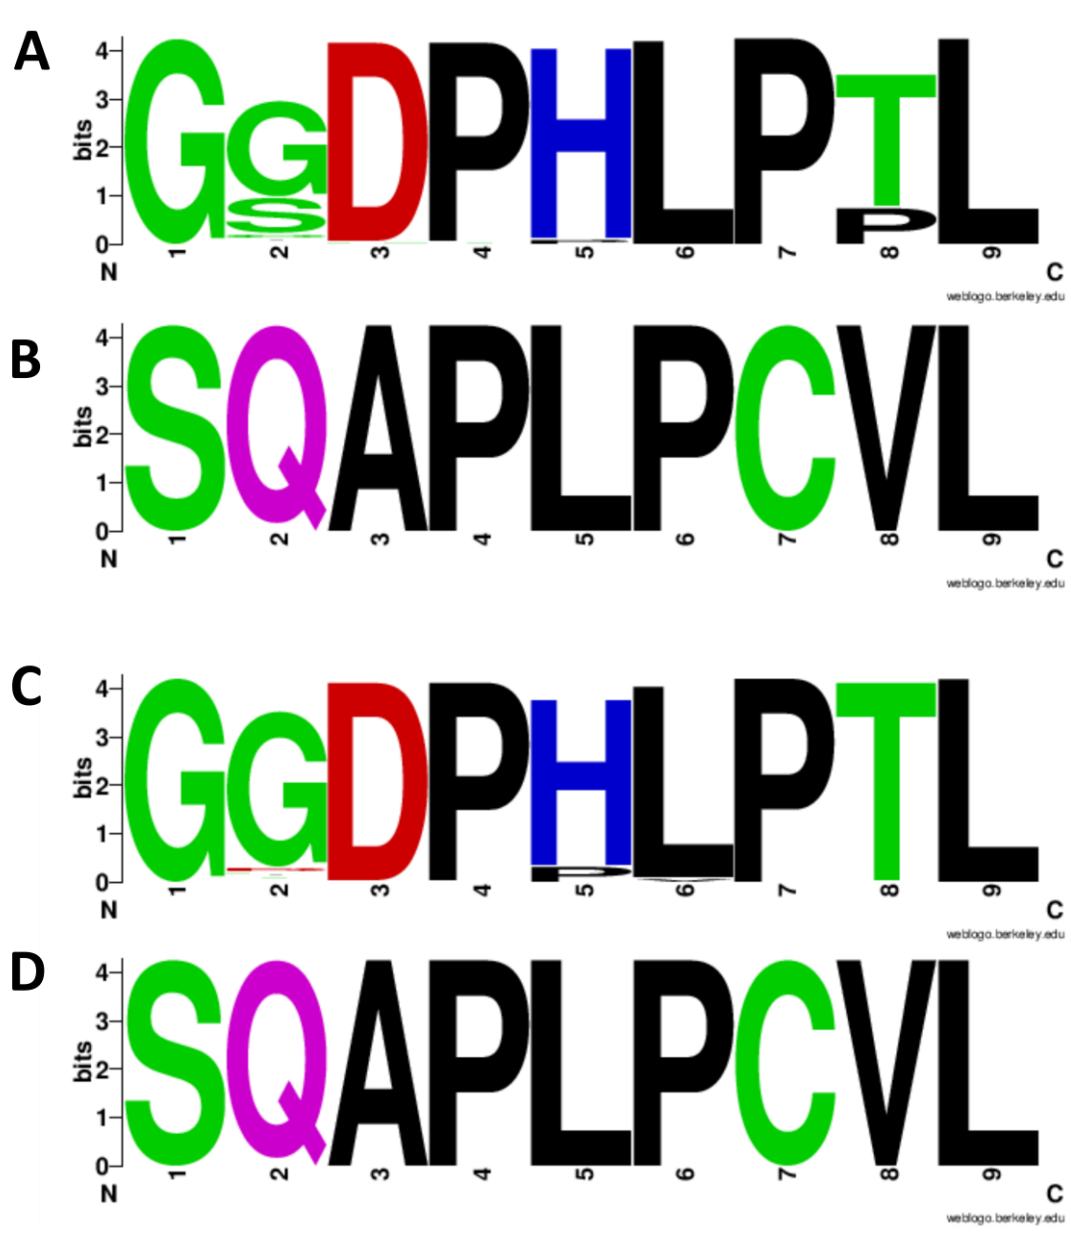

189

190

191 Figure S1: Sequence logo alignment of the relative frequency of (A,C) *LMP-1* peptide variants  
192 and (B;D) *BZLF1*-derived *SQAPLPCVL* from *N*=786 sequenced *BZLF1* and partially sequenced  
193 *LMP-1* genes. (A,B) Sequence logo alignment of the relative frequency of (A) *LMP-1* peptide  
194 variants and (B) *BZLF1*-derived *SQAPLPCVL* from *N*=578 sequenced *BZLF1* and partially  
195 sequenced *LMP-1* genes from IM patients. (C,D) Sequence logo alignment of the relative  
196 frequency of (C) *LMP-1* peptide variants and (D) *BZLF1*-derived *SQAPLPCVL* from *N*=208  
197 sequenced *BZLF1* and partially sequenced *LMP-1* genes from elderly, NON-PTLD and PTLD  
198 patients with EBV reactivations. Sequence logos were created with the web-tool of the  
199 University of California, (<https://weblogo.berkeley.edu/>).

200

Figure S2

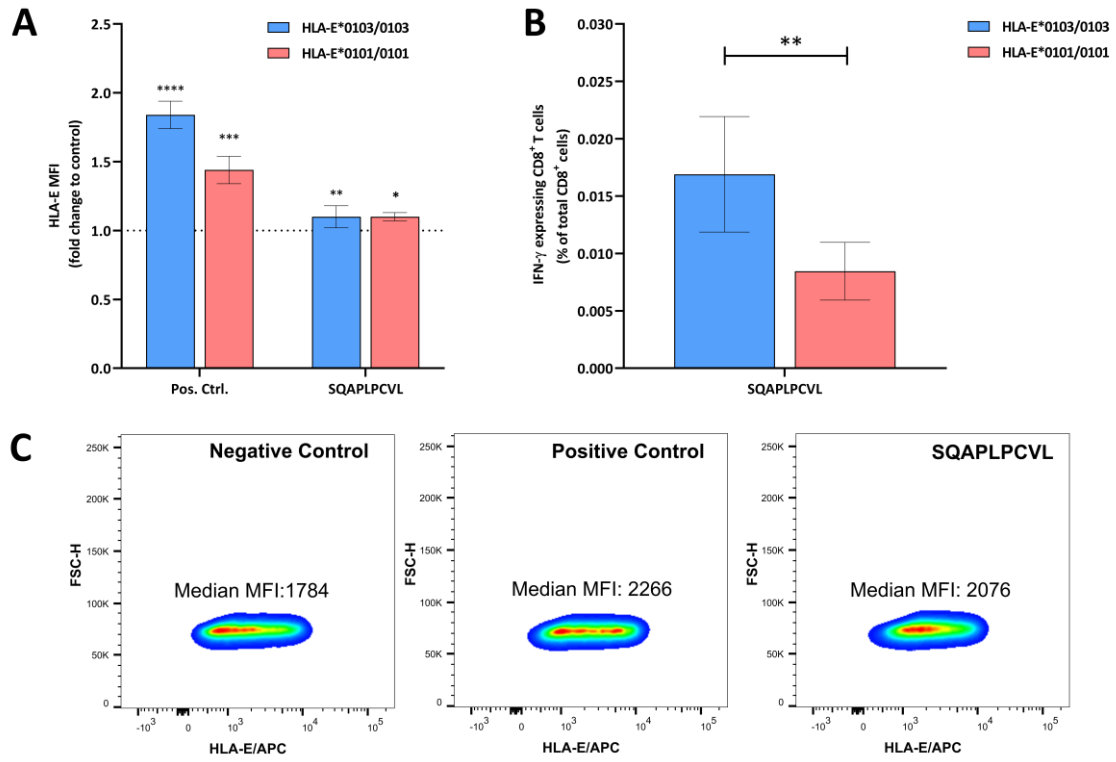

201

202

203 Figure S2: SQAPLOCVL-mediated HLA-E stabilization and NKG2A<sup>+</sup> inhibition assay (A) HLA-E  
204 stabilization assay: K562-HLA-E\*0103/0103 or K562-HLA-E\*0101/0101 cells were incubated  
205 together with 300µM of the positive control (VMAPRTLIL) or the *BZLF1*-derived *SQAPLPCVL*  
206 peptide. The surface expression of HLA-E was assessed after 16h of co-culture by flow-  
207 cytometry. Box plot represent the mean ( $\pm$ SD) of three independent replicates. Each peptide  
208 was compared to the negative control (dashed black line), *i.e.* K562-HLA-E\*0103/0103 or  
209 K562-HLA-E\*0101/0101 cells without peptides using the Mann-Whitney test. (B) Analysis of  
210 *SQAPLPCVL*-specific and HLA-E restricted CD8<sup>+</sup> T cell responses, evaluated between 12 healthy  
211 EBV-seropositive individuals by flow-cytometry. Enriched CD8<sup>+</sup> T cells were stimulated either  
212 with K562-HLA-E\*0103/0103 or K562-HLA-E\*0101/0101 cells and 300µM of the *SQAPLPCVL*  
213 peptide. CD8<sup>+</sup> T cells were then analyzed for the expression of IFN $\gamma$ . Box bpot represent the  
214 mean ( $\pm$ SD) of 12 independent replicates. The percentage of IFN $\gamma$ -expressing cells was  
215 compared between with K562-HLA-E\*0103/0103 and K562-HLA-E\*0101/0101 cells by the  
216 paired T-test. (C) Representative examples and median MFI of the negative control (without  
217 peptide), positive control (VMAPRTLIL) or *SQAPLPCVL*-induced HLA-E surface stabilisation on  
218 peptide pulsed K562-HLA-E\*0103/0103 cells. **MFI**: mean fluorescence intensities

219

## Figure S3

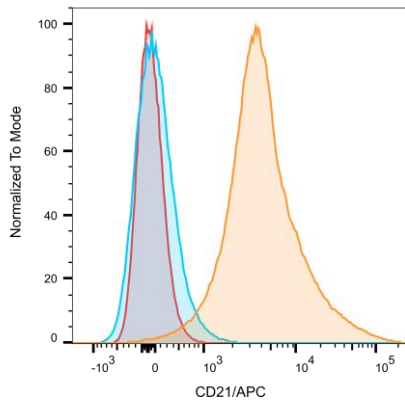

220

221 Figure S3: Representative example of established K562-CR2-HLA-E\*0103/0103 cell line using  
222 CRISPR gene editing. Overlay of CR2-APC stained K562-CR2-HLA-E\*0103/0103 cells (orange),  
223 CR2-APC stained K562-HLA-E\*0103/0103 cells (blue) and unstained K562-CR2-HLA-  
224 E\*0103/0103 cells.

225

## Figure S4

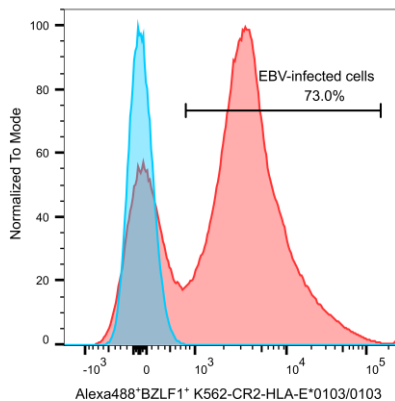

226

227 Figure S4: Representative example of BZLF1 stained (red) and unstained (blue) EBV-infected  
228 K562-CR2-HLA-E\*0103/0103 cells, obtained after 15 days of infection in the absence of  
229 SQAPLPCVL-specific and HLA-E restricted CD8<sup>+</sup> T cells.

230

## Figure S5

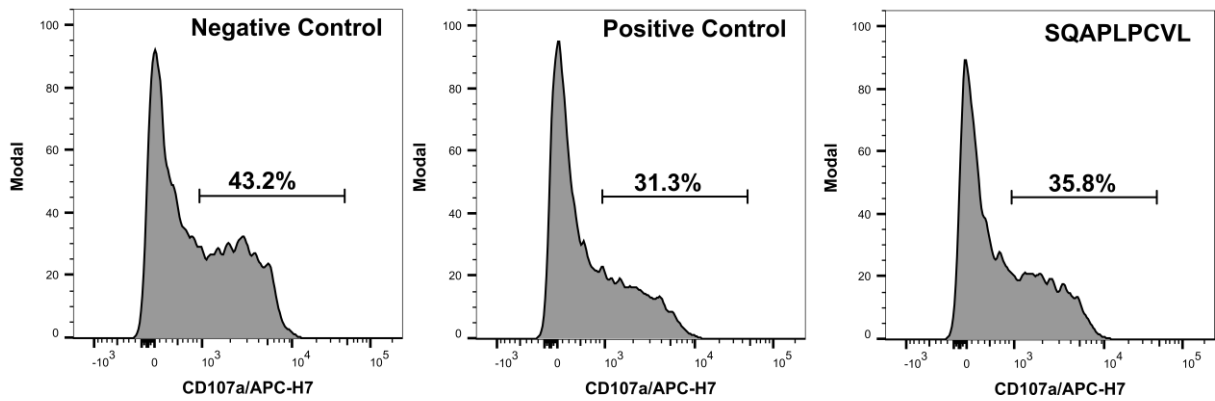

231

232 Figure S5: Representative example of the NKG2A<sup>+</sup> inhibition assay. K562-HLA-E\*0103/0103  
233 cells were first incubated together with 300 $\mu$ M of the negative control (without peptide),  
234 positive control (VMAPRTLIL) or the *BZLF1*-derived *SQAPLPCVL* and then incubated together  
235 with pre-activated CD56<sup>+</sup> NK cells from the same donor. The percentage of CD107 expressing  
236 NKG2A<sup>+</sup> NK cells was assessed by flow-cytometry.

237

Figure S6

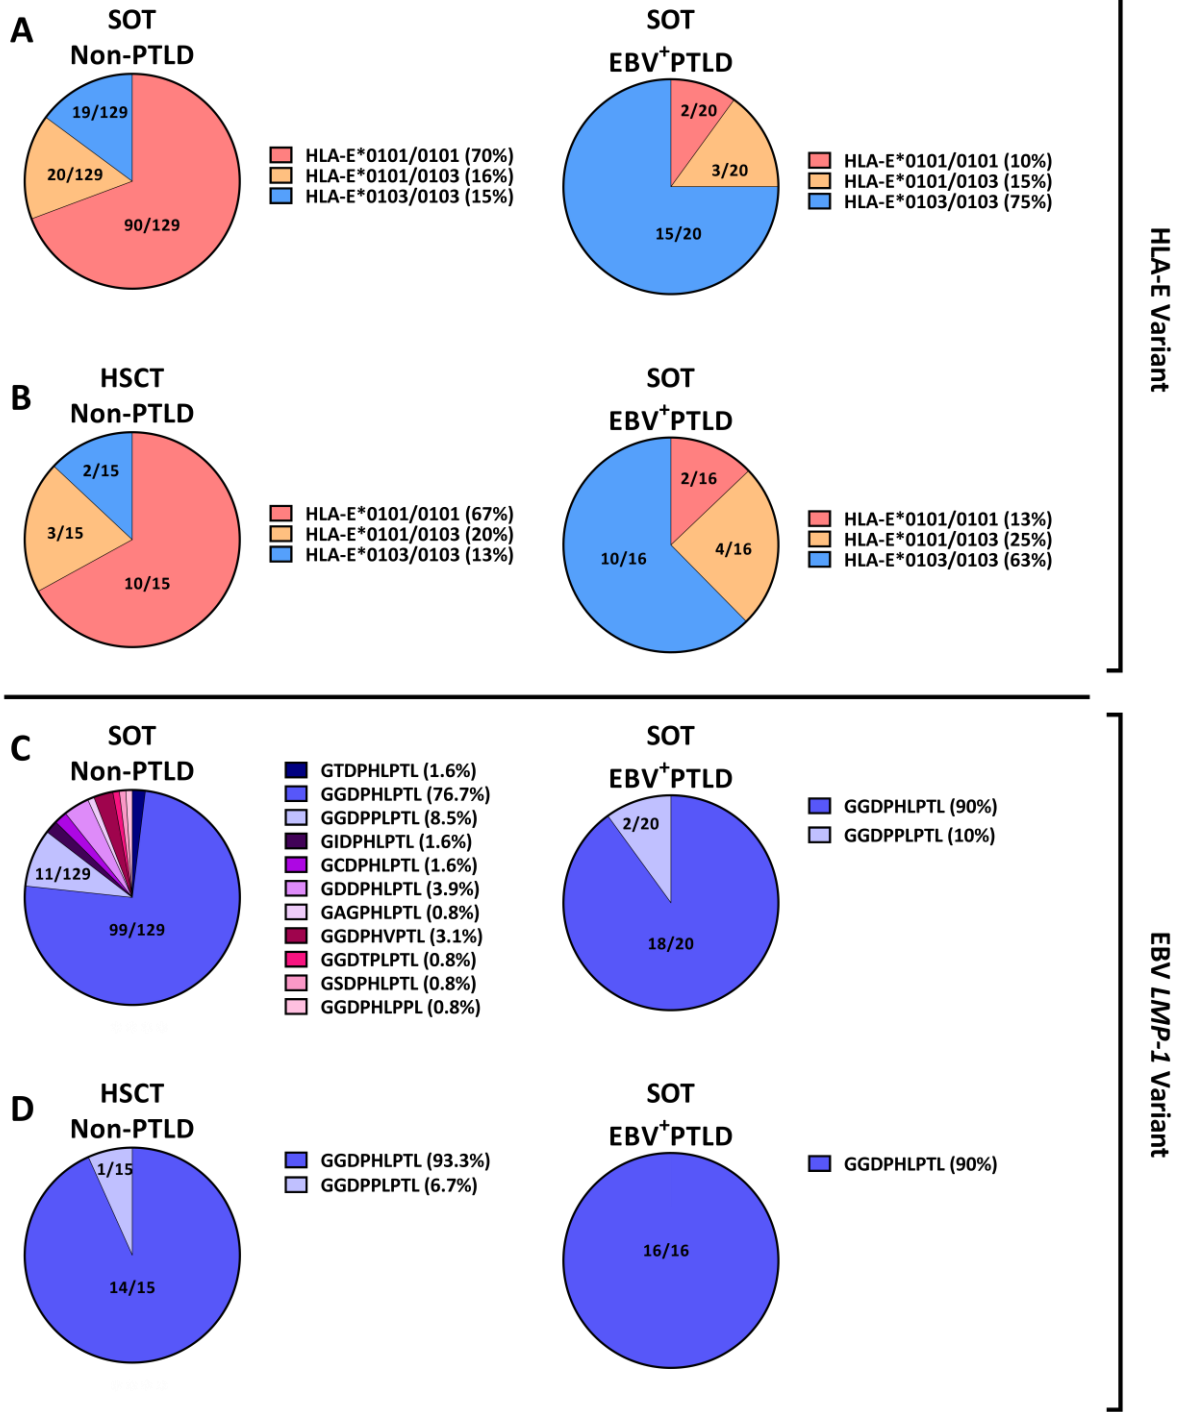



239 Figure S6: Distribution of HLA-E and *LMP-1* peptide variants in transplant recipients with and  
240 without PTLD. (A-B) Distribution and comparison of HLA-E variants between (A) SOT Non-PTLD  
241 (*N*=129) and SOT PTLD (*N*=20) or (B) HSCT Non-PTLD (*N*=15) and HSCT PTLD (*N*=16). Fractions  
242 represent the relative frequency of HLA-E\*0101/0101, HLA-E\*0101/0103 and HLA-  
243 E\*0103/0103. (C-D) Distribution and comparison of *LMP-1* peptide variants between (A) SOT  
244 Non-PTLD (*N*=129) and SOT PTLD (*N*=20) or (B) HSCT Non-PTLD (*N*=15) and HSCT PTLD (*N*=16).  
245 Fractions represent the relative frequency of the *LMP-1* peptide variants *GGDPHLPTL*,  
246 *GSDPHLPTL*, *GGDPHLPL*, *GGDPPLPTL*, *GCDPHLPTL*, *GIDPHLPTL*, *GAGPHLPTL*, *GGDTPLPTL*,  
247 *GDDPHLPTL*, *GGDPHVPTL* and *GTDPHLPTL*. **HSCT**: hematopoietic stem cell transplantation,  
248 **PTLD**: post-transplant lymphoproliferative disorders, **SOT**: solid organ transplantation.

**Figure S7**

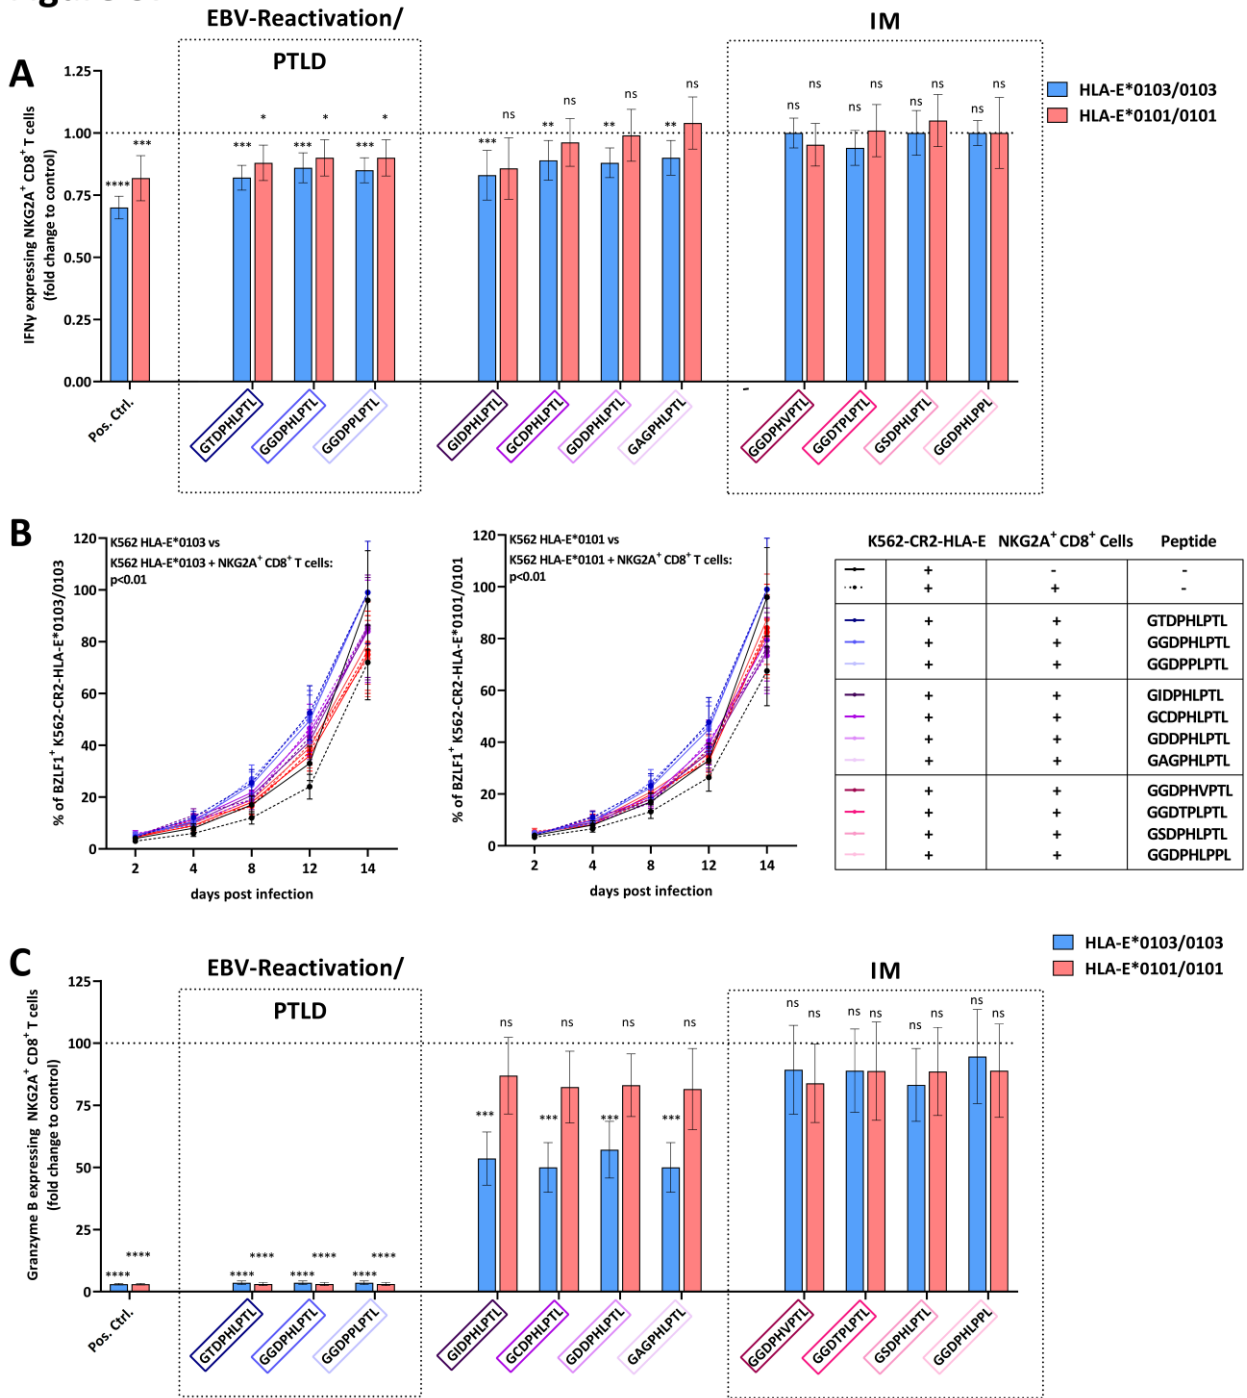

250 Figure S7: LMP-1-derived peptides are a potent Inhibitor of NKG2A<sup>+</sup> CD8<sup>+</sup> T cells. (A) NKG2A<sup>+</sup>  
251 inhibition assay: K562-HLA-E\*0103/0103 or K562-HLA-E\*0101/0101 cells were first incubated  
252 together with 300μM of the positive control (VMAPRTLIL) or the LMP-1 derived *GGDPHLPTL*,  
253 *GSDPHLPTL*, *GGDPHLPL*, *GGDPPLPTL*, *GCDPHLPTL*, *GIDPHLPTL*, *GAGPHLPTL*, *GGDTPLPTL*,  
254 *GDDPHLPTL*, *GGDPHVPTL* and *GTDPHLPTL* peptides and then incubated together with pre-  
255 activated enriched NKG2A<sup>+</sup> CD8<sup>+</sup> T Cells. The percentage of IFN $\gamma$  expressing NKG2A<sup>+</sup> CD8<sup>+</sup> T  
256 cells was assessed by flow-cytometry. Box plot represent the mean ( $\pm$ SD) of 12 independent  
257 biological replicates. Each peptide was compared to the negative control (dashed black line),  
258 *i.e.* K562-HLA-E\*0103/0103 or K562-HLA-E\*0101/0101 cells without peptides using the Mann-  
259 Whitney test. (B-C) EBV dissemination assay: K562-CR2-HLA-E\*0103/0103 or K562-CR2-HLA-  
260 E\*0101/0101 cells were infected with the EBV B95-8 isolate and cultured together with sorted  
261 NKG2A<sup>+</sup> CD8<sup>+</sup> T cells for 2, 4, 8, 12 or 14 days. The percentage of (B) *BZLF1*<sup>+</sup> K562-CR2-HLA-  
262 E\*0103/0103 or K562-CR2-HLA-E\*0101/0101 cells or (C) granzyme B-expressing NKG2A<sup>+</sup> CD8<sup>+</sup>  
263 T cells was assessed by flow-cytometry after 2, 4, 8, 12 or 14 days of co-culture. The dashed  
264 black line indicates the percentage of granzyme B-expressing CD8<sup>+</sup> T cells in the absence of  
265 any peptides. (B) RM one-way ANOVA (with the Geisser-Greenhouse correction) was used to  
266 analyze differences between groups. (C) Each peptide was compared to the negative control  
267 (dashed black line), *i.e.* K562-HLA-E\*0103/0103 cells or K562-HLA-E\*0101/0101 cells without  
268 peptides using the Mann-Whitney test. (B-C) Plots represent the mean ( $\pm$ SD) of 12  
269 independent biological replicates.  $p < 0.05$  was considered significant. \*,  $p < 0.05$ ; \*\*,  $p < 0.01$ ;  
270 \*\*\*,  $p < 0.001$ ; \*\*\*\*,  $p < 0.0001$ . **IFN $\gamma$** : Interferon  $\gamma$ , **Pos.Ctrl.:** positive control.

271

272 **Supplementary References**

- 273 1. Vietzen H, Pollak K, Honsig C, Jaksch P, Puchhammer-Stockl E. NKG2C Deletion Is a Risk  
274 Factor for Human Cytomegalovirus Viremia and Disease After Lung Transplantation. *J Infect*  
275 *Dis.* 2018;217(5):802-806.
- 276 2. Paquay MM, Schellekens J, Tilanus MG. A high-throughput Taqman approach for the  
277 discrimination of HLA-E alleles. *Tissue Antigens.* 2009;74(6):514-519.
- 278 3. Mbiribindi B, Pena JK, Arvedson MP, et al. Epstein–Barr virus peptides derived from  
279 latent cycle proteins alter NKG2A + NK cell effector function. *Scientific Reports.*  
280 2020;10(1):19973.
- 281 4. Lorenzetti MA, Gantuz M, Altcheh J, De Matteo E, Chabay PA, Preciado MV. Epstein–  
282 Barr virus BZLF1 gene polymorphisms: malignancy related or geographically distributed  
283 variants? *Clinical Microbiology and Infection.* 2014;20(11):O861-O869.
- 284 5. Aberle SW, Puchhammer-Stöckl E. Diagnosis of herpesvirus infections of the central  
285 nervous system. *J Clin Virol.* 2002;25 Suppl 1:S79-85.
- 286 6. Heatley SL, Pietra G, Lin J, et al. Polymorphism in human cytomegalovirus UL40 impacts  
287 on recognition of human leukocyte antigen-E (HLA-E) by natural killer cells. *The Journal of*  
288 *biological chemistry.* 2013;288(12):8679-8690.

289
